# Supplementary material
Source: publisher figshare collection journal article supplement (https://rs.figshare.com/ndownloader/files/14172716)
Supplement: Supplementary file 1 [file 14172716]

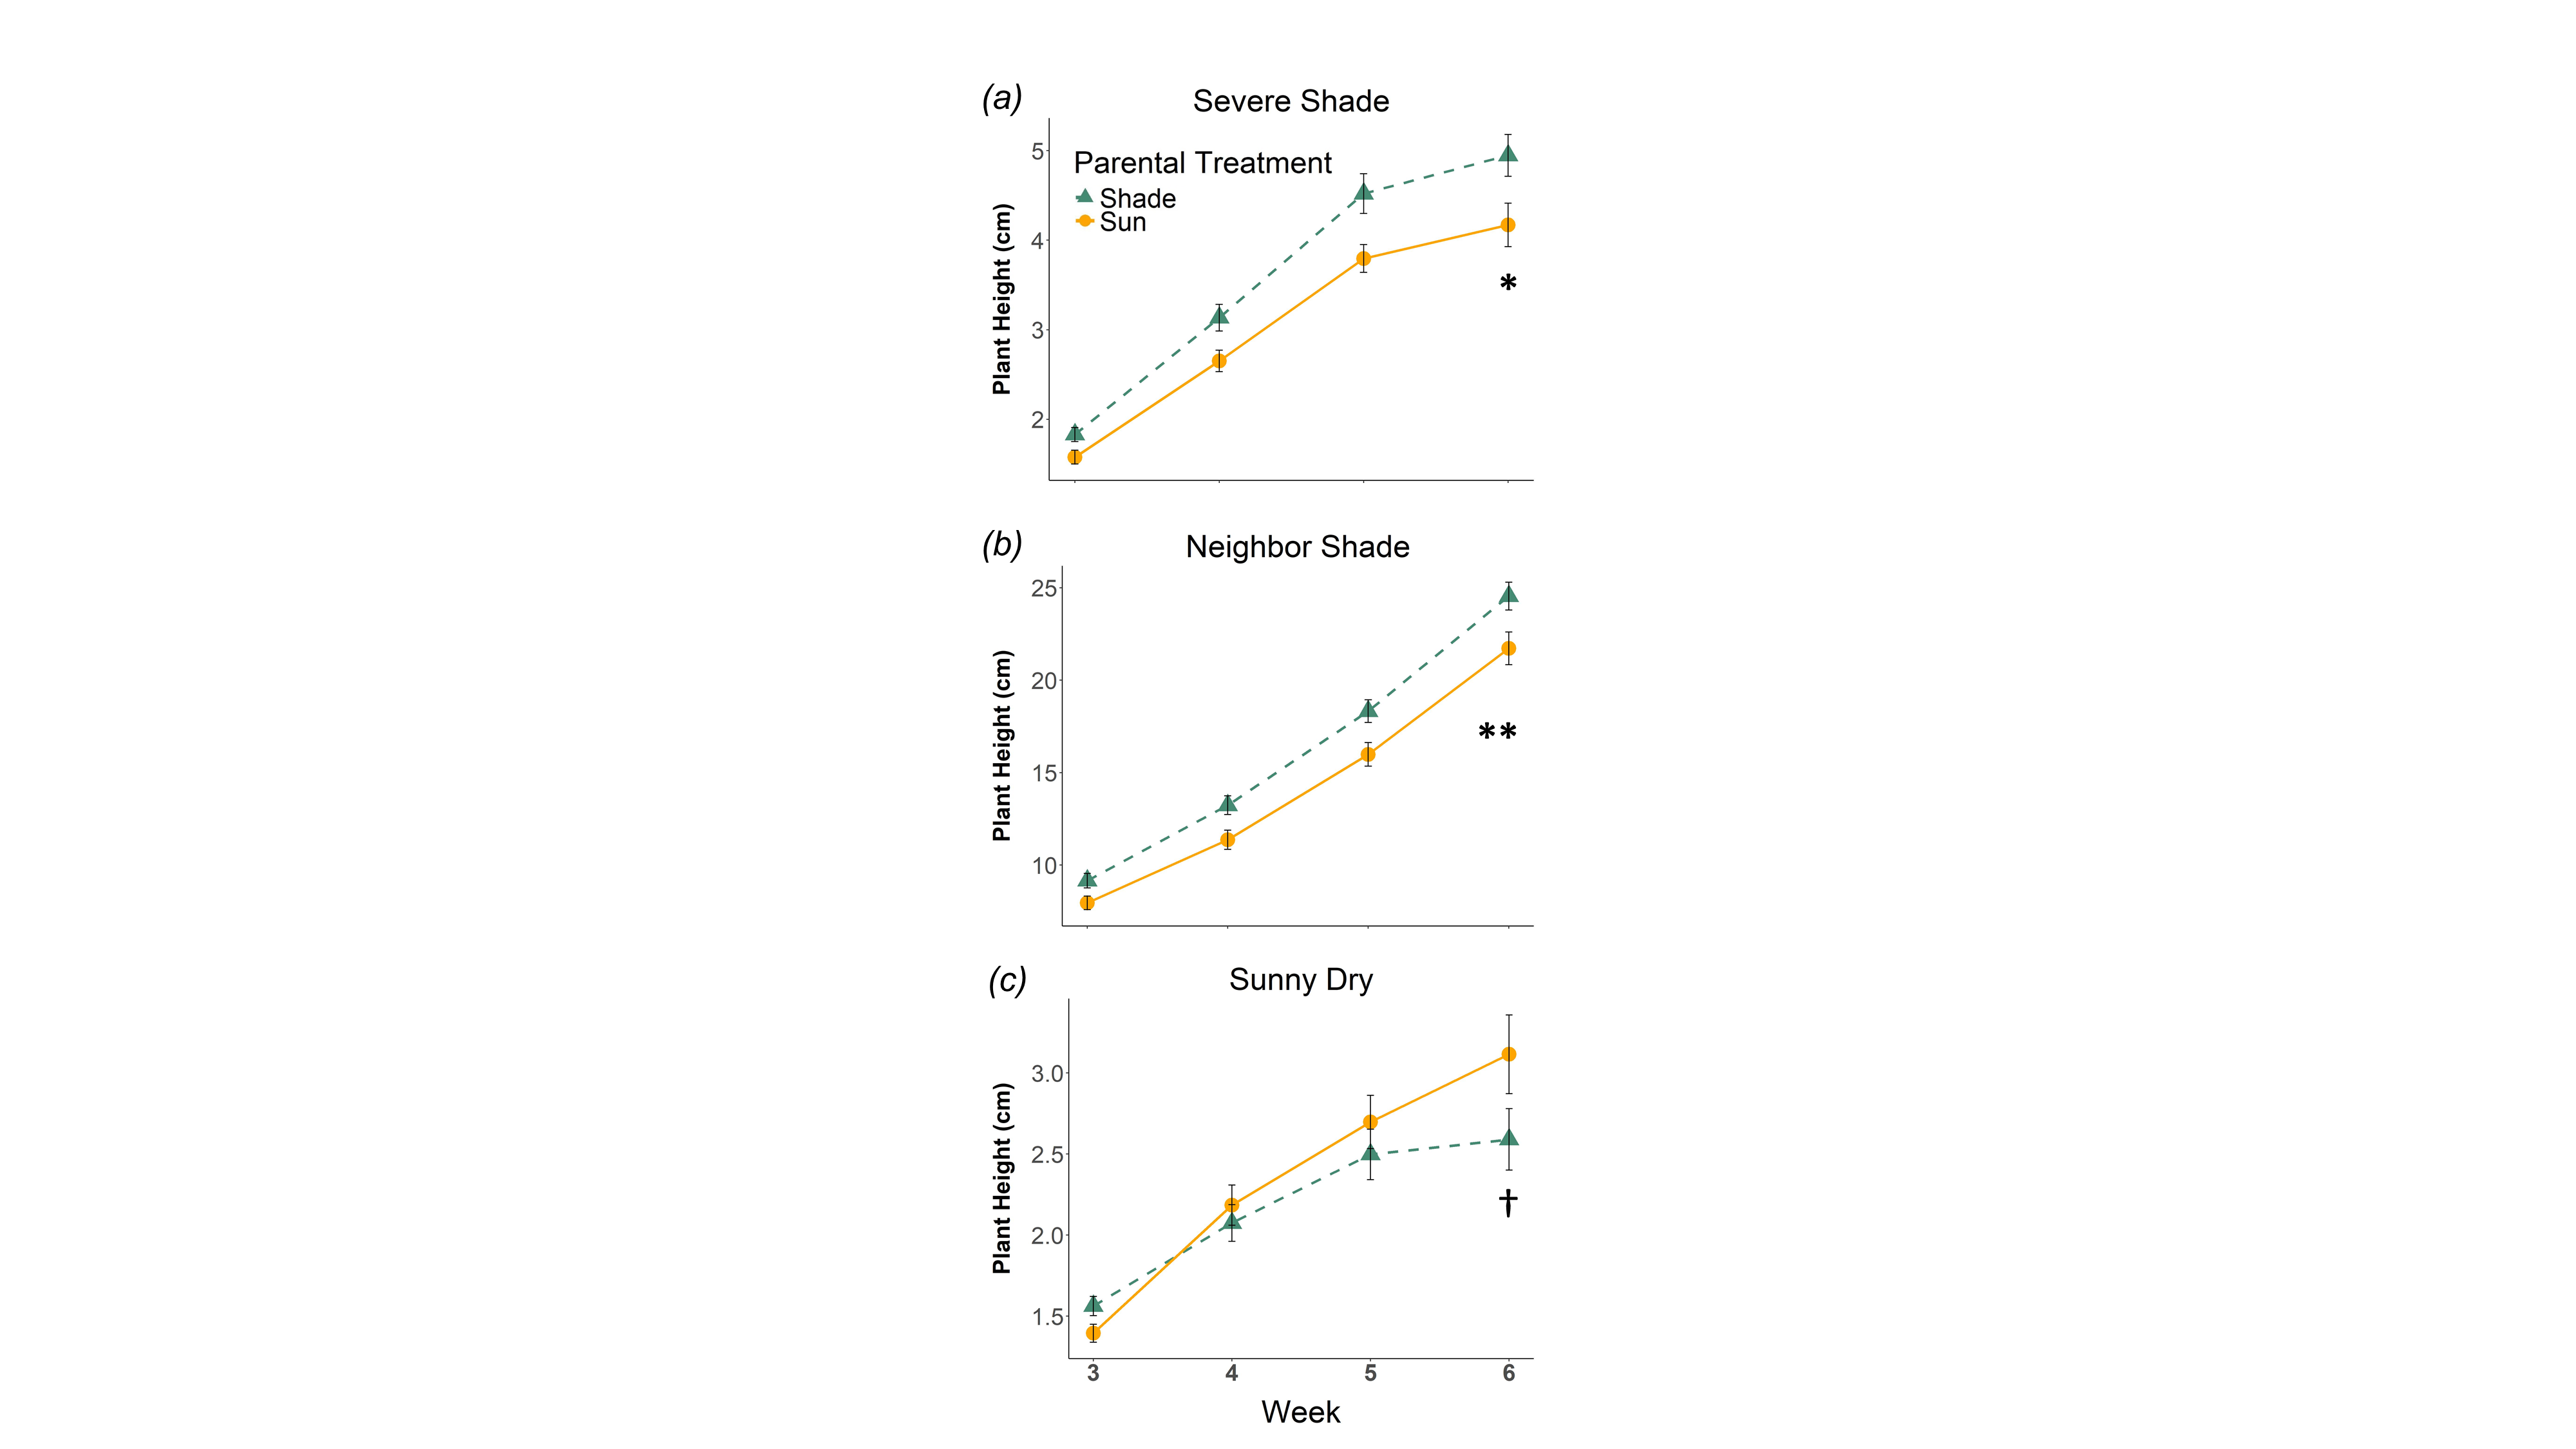


**Supplemental Figure 2.** Effects of Parental Sun vs Parental Shade on height extension over time for plants grown in three contrasting offspring treatments, (*a*) Severe Shade; (*b*) Neighbor Shade; (*c*) Sunny Dry. Means ± s.e. are shown (pooled across 5 genotypes). The parental treatment effect varied significantly over time (Parental Treatment x Time interaction term, multivariate repeated-measures ANOVA) in the Sunny Dry offspring treatment (p = 0.039) but was marginally nonsignificant in Severe Shade (p = 0.074) and nonsignificant in Neighbor Shade (p = 0.269), where extension curves over time are nearly parallel. Significance tests are shown for the effect of Parental Shade versus Parental Sun on in each Offspring Treatment (Simple Effects Tests; † p < 0.10, *p < 0.05, **p < 0.01. Details in *Methods*).
